# Supplementary material for: MicroRNA26 attenuates vascular smooth muscle maturation via endothelial BMP signalling
Source: PLoS Genet. 2019 May 15;15(5):e1008163. doi: 10.1371/journal.pgen.1008163 (PMC6538191; doi:10.1371/journal.pgen.1008163)
Supplement: S1 File — File of raw data underlying graphs. (XLSX) [file pgen.1008163.s007.xlsx]

## Sheet: Fig 2
Graph B	control			48hpf miR26a MO
	Mean	SEM	N	Mean	SEM	N
miR26a	1	0	3	0.74	0.06557	3
Graph C	control			48hpf miR26a CRISPRi
	Mean	SEM	N	Mean	SEM	N
miR26a	1	0	3	0.6567	0.1087	3
Graph E	control			48hpf miR26a MO
	Mean	SEM	N	Mean	SEM	N
smad1	1	0	3	1.67	0.1317	3
Graph F	control			4Dpf miR26a MO
	Mean	SEM	N	Mean	SEM	N
smad1	1	0	4	1.83	0.1249	4

## Sheet: Fig 4
Graph I
% Phenotype at 49hpf	HEM			V1			V2
	Mean	SEM	N	Mean	SEM	N	Mean	SEM	N
Wildtype	2.21	0.9452	4	0.42	0.4175	4	0	0	4
Scr.Control MO	1.625	0.2394	4	0	0	4	0	0	4
miR26a MO	13.41	0.8325	4	3.28	2.064	4	0	0	4
smad1 mRNA	12.66	0.9448	4	2.77	1.174	4	0	0	4
miR26a MO + smad1 MO	3.048	0.8322	4	38.26	4.004	4	8.5	15.82	4
smad1 MO	0.75	0.4203	4	77.21	8.626	4	12.25	17.39	4

## Sheet: Fig 5
Graph H	4dpf Scr.Control			4dpf miR26a MO
	Mean	SEM	N	Mean	SEM	N
acta2	1	0	3	1.724	0.0984886	3
myh11a	1	0	3	1.761	0.436438	3
pdgfrß	1	0	3	3.555	0.132467	3
pdgfBA	1	0	3	1.986	0.430214	3
notch3	1	0	3	1.934	0.232383	3

## Sheet: Fig 6
Graph B	Control			smad1-ECOE
	Mean	SEM	N	Mean	SEM	N
smad1	1	0.358032	3	1.90477	0.369151	3
id1	1	0.406737	3	1.38815	0.245954	3
Graphs E-H	Control			smad1-ECOE
	Mean	SEM	N	Mean	SEM	N
BRE:EGFP intensity a.u.	79357	5251	3	112193	10895	3
# of acta2 positive cells	15.6	0.6797	3	24.5	1.452	3
Length of Ventral Aorta um	200.6	4.44	3	198.4	4.28	3
% coverage on ventral aorata	65.33	2.104	3	80.28	2.052	3

## Sheet: Fig 7
Graph G	DMSO			15M K02288
# of acta2 positive cells	Mean	SEM	N	Mean	SEM	N
Wildtype	28.8889	0.633431	3	11.2222	1.21081	3
miR26a MO	35.2222	2.43686	3	27.3333	1.46249	3
miR26 CRISPRi	37.6667	1.43372	3	23.6667	2.08833	3
Graph H	DMSO			15M K02288
Length of Ventral Aorta um	Mean	SEM	N	Mean	SEM	N
Wildtype	156.778	3.59698	3	77.5556	7.10069	3
miR26a MO	174.111	3.0797	3	158	7.91096	3
miR26 CRISPRi	177.444	8.69085	3	136.222	5.95767	3
Graph M	DMSO			15M K02288
# of fli1a positive cells	Mean	SEM	N	Mean	SEM	N
Wildtype	20.56	0.7286	3	16	0.2887	3
miR26a MO	19.67	0.441	3	18.33	0.1667	3
Graph N	DMSO			15M K02288
% pSma1/fli1a positive cells	Mean	SEM	N	Mean	SEM	N
Wildtype	43.41	1.059	3	27.95	2.089	3
miR26a MO	61.01	2.703	3	47.37	2.075	3

## Sheet: SFig 1
Graph B	kdrl:mCherry+ve			acta2:EGFP+ve
	Mean	SEM	N	Mean	SEM	N
miR26a	1	0.0455	2	0.52	0.266	2
Graph C	acta2:EGFP+ve			kdrl:mCherry+ve
	Mean	SEM	N	Mean	SEM	N
acta2	37.56	1.619	2	0.025	1.411	2
acvrl1 (alk1)	0.255	0.03	2	3.495	1.036	2
smad1	0.075	0.005	2	14.14	1.605	2

## Sheet: SFig 2
Graph B	EGFP-smad1 sensor			EGFP-smad1 sensor + miR26a MO
	Mean	SEM	N	Mean	SEM	N
CTCF	316.6	27.53	3	466	54.61	3

## Sheet: SFig 6
Graph B	Hemorrhage			Hydrocephalus			Pericardial Edema
	Mean	SEM	N	Mean	SEM	N	Mean	SEM	N
Control	1.33333	1.33333	3	2.78	1.39	3	1.11	1.11	3
5ng smad1ECOE	18.25	1.18145	3	5.08333	0.650854	3	8.08333	1.08333	3
10ng smad1ECOE	2.85667	1.48679	3	76.0633	11.3534	3	71.6467	7.11527	3
20ng smad1ECOE	9.10333	0.819864	3	63.7167	6.97028	3	84.7267	6.30581	3
